# Supplementary material for: Structural variants identified by Oxford Nanopore PromethION sequencing of the human genome
Source: HighWire-hosted journal article supplement (doi:10.1101/gr.244939.118), 2019-06-11
Supplement: Supplemental_Material.docx [file Supplemental_Material.docx]

Supplemental material

Contents

[Supplemental Methods 2](#_Toc10467490)

[Commands used for alignment and SV calling 2](#_Toc10467491)

[Supplemental Tables 3](#_Toc10467492)

[Supplemental Figures 10](#_Toc10467493)

[Supplemental Code 17](#_Toc10467494)

## Supplemental Methods

### Commands used for alignment and SV calling

The output of alignments is piped directly to samtools sort to generate sorted bam files.

NGMLR

zcat *.fastq.gz | ngmlr --presets ont -t {threads} -r {genome}

minimap2

minimap2 --MD -a -t {threads} {genome} *.fastq.gz

minimap2-pbsv

minimap2 -t {threads} -a --MD --eqx -L -O 5,56 -E 4,1 -B 5 --secondary=no -z 400,50 -r 2k -Y -R @RG\tID:rg1a\tSM:NA19240 {genome} *.fastq.gz

LAST

The index was built using a reference genome masked with WindowMasker [(Morgulis et al., 2006)](https://paperpile.com/c/7zuFMX/JoqZ). The substitution matrix was obtained from last-train [(Hamada et al., 2017)](https://paperpile.com/c/7zuFMX/Eauv).

lastal -P8 -p training.par lastdb_GRCh38-wm *.fastq.gz | last-split -m1e-6 | maf-convert -f genome.dict sam /dev/stdin

Sniffles
Sniffles -m {alignment} -v {output-calls} -t {threads}
Sniffles -m {alignment} -v {output-genotypes} -t {threads} --Ivcf {output-calls}

NanoSV
NanoSV --bed {exons.bed} -t {threads} -s samtools {input.bam} -o {output.vcf}

pbsv
pbsv discover {alignment} variants.svsig.gz
pbsv call {genome} variants.svsig.gz {output}

SVIM
svim alignment {output} {alignment}

npInv
java -jar npInv1.21.jar --input {alignment.bam} --output {output.vcf}

## Supplemental Tables

| **Supplemental table S1: Library prep metrics** | | | | | | | | | | **Ligation** | | **Sequencing** | |
| --- | --- | --- | --- | --- | --- | --- | --- | --- | --- | --- | --- | --- | --- |
| **ID** | **Extraction** | **size**  **[kb]** | **Shearing** | **Size cutoff**  **[kb]** | **260/280** | **260/230** | **Kit** | **Active pores** | **Mass input  [µg]** | **Size**  **[kb]** | **Molarity [fmol]** | **Mass [µg]** | **Molarity**  **[fmol]** |
| P1 | PSS 8LX | 38.4 | NA | >10 | 1.82 | 2.32 | LSK109 | 7179 | 8.46 | 38.0 | 360.3 | 5.9 | 250 |
| P2 | QIAamp | 40.6 | 20 kb | >8 | 1.85 | 2.43 | LSK109 | 7339 | 2.38 | 18.7 | 193.6 | 0.8 | 69.2 |
| P3 | QIAamp | 40.6 | NA | >10 | 1.85 | 2.45 | LSK109 | 4224* | 2.24 | 41.9 | 109.2 | 0.6 | 23.3 |
| P4 | QIAamp | 40.6 | NA | >10 | 1.86 | 2.32 | LSK108 | 7019 | 3.6 | 38.9 | 129.9 | 1 | 41.9 |
| P5 | pool | 39.5 | 20 kb | >6 | 1.87 | 2.43 | LSK109 | 7154 | 4.3 | 15.8 | 374.6 | 1.2 | 123.2 |
| M1 | QIAamp | 40.6 | NA | >10 | 1.82 | 2.32 | LSK109 | 899 | 7.15 | 33.6 | 289 | 3 | 144.5 |
| M2 | QIAamp | 40.6 | NA | >10 | 1.82 | 2.52 | LSK109 | 1249 | 1.4 |  |  | 0.29 | 11.7 |

*Extraction* is specifying the DNA extraction method (sample P5 is a pool of both); *size* specifies average DNA smear size on Fragment Analyzer in kb after extraction (Advanced Analytical, Agilent, USA); *Shearing* specifies size to which sample was fragmented using Megaruptor if applicable (Diagenode, BE); *Size cutoff* specifies the lower limit used during BluePippin electrophoresis; *260/280* and *260/230* specify the purity of the aliquots after BluePippin size selection and AMPure XP final bead purification; *Active pores* specifies the number of active pores detected by mux-scan after loading the library; *Mass lib prep* specifies mass of DNA used at the start of library prep; *size DNA* specifies the average size of the fragments used in the ligation step, measured with Fragment Analyzer (Advanced Analytical, Agilent, USA); *Mol DNA for ligation* specifies amount of femto-moles used for each ligation reaction; *Mass*. specifies mass of each library loaded onto PromethION flow-cell; *Mol seq*. specifies molarity of library loaded on flow cell in fmol; *While loading a library onto PromethION flow cell an air bubble was introduced in one quadrant, causing decreased active pore numbers prior to sequencing.

| **Supplemental Table S2: number of variants identified per type, per dataset** | | | | | | | | | | | |
| --- | --- | --- | --- | --- | --- | --- | --- | --- | --- | --- | --- |
| Variant type | **minimap2** | | | **minimap2-pbsv** | | | **LAST** | **NGMLR** | | | |
| Sniffles | NanoSV | SVIM | NanoSV | pbsv | SVIM | NanoSV | Sniffles | NanoSV | SVIM | pbsv |
| Insertion | 12918 | 37009 | 300252 | 39445 | 13693 | 252620 | 7396 | 10535 | 24268 | 71246 | 11177 |
| Deletion | 11897 | 19356 | 58946 | 19676 | 11293 | 47176 | 14837 | 10688 | 17261 | 26956 | 10081 |
| Duplication | 11 | 624 | 4024 | 613 | - | 4916 | 9324 | 67 | 1548 | 32361 | - |
| Inversion | 326 | - | 23 | - | 36 | 26 | - | 593 | - | 119 | 36 |
| Undetermined | 948 | 4313 | - | 4508 | 5008 | - | 8360 | 574 | 4481 | - | 15144 |

| **Supplemental Table S3: precision and recall**  Accuracy metrics of SVs as identified per aligner and variant caller, compared with the truth set [(Chaisson et al., 2018)](https://paperpile.com/c/7zuFMX/lTyzY). | | | | |  |
| --- | --- | --- | --- | --- | --- |
| **Data** | **Aligner** | **Call set** | **Precision** | **Recall** | **F-measure** |
| PromethION | NGMLR | NanoSV | 0.6417 | 0.6715 | 0.6562 |
| Sniffles | 0.7568 | 0.6579 | 0.7039 |
| SVIM | 0.6124 | 0.7236 | 0.6634 |
| pbsv | 0.4649 | 0.6292 | 0.5348 |
| high confidence | 0.8769 | 0.5237 | 0.6558 |
| high sensitivity | 0.3851 | 0.774 | 0.5143 |
| minimap2 | NanoSV | 0.6223 | 0.7023 | 0.6599 |
| Sniffles | 0.6859 | 0.6899 | 0.6879 |
| SVIM | 0.6179 | 0.7272 | 0.6681 |
| high confidence | 0.8215 | 0.6013 | 0.6944 |
| high sensitivity | 0.5121 | 0.7693 | 0.6149 |
| minimap2-pbsv | NanoSV | 0.6144 | 0.7185 | 0.6624 |
| SVIM | 0.6013 | 0.737 | 0.6623 |
| pbsv | 0.6153 | 0.6775 | 0.6449 |
| high confidence | 0.7902 | 0.6389 | 0.7065 |
| high sensitivity | 0.4635 | 0.7555 | 0.5745 |
| LAST | NanoSV | 0.596 | 0.5859 | 0.5909 |
| Illumina | BWA-MEM | manta | 0.55 | 0.28 | 0.37 |
| BWA-MEM | lumpy | 0.18 | 0.04 | 0.07 |

**Supplemental table S4: F-measure of aligners and variant callers agnostic to SV type**

|  | **structural variant caller** | | | |
| --- | --- | --- | --- | --- |
| **aligner** | NanoSV | Sniffles | pbsv | SVIM |
| LAST | 0.70 | NA | NA | NA |
| NGMLR | 0.74 | 0.75 | 0.56 | 0.72 |
| minimap2 | 0.74 | 0.73 | NA | 0.72 |
| minimap2-pbsv | 0.74 | NA | 0.68 | 0.72 |
| NA: incompatible aligner or parameter settings for this structural variant caller | | | | |

**Supplemental Table S5: F-measure of aligners and variant callers limited to inversions**

|  | **structural variant caller** | | | |
| --- | --- | --- | --- | --- |
| **aligner** | Sniffles | pbsv | SVIM | npInv |
| NGMLR | 0.16 | 0.29 | 0.23 | 0.22 |
| minimap2 | 0.17 | NA | 0.21 | 0.24 |
| minimap2-pbsv | NA | 0.31 | 0.22 | 0.21 |
| NA: incompatible aligner or parameter settings for this structural variant caller | | | | |

**Supplemental Table S6: F-measure of aligners and variant callers for gains and loss of sequence**

| **aligner** | **SV caller** | **F-measure gain** | **F-measure loss** |
| --- | --- | --- | --- |
| LAST | NanoSV | 0.62 | 0.77 |
| minimap2 | NanoSV | 0.69 | 0.79 |
| Sniffles | 0.72 | 0.75 |
| SVIM | 0.66 | 0.73 |
| minimap2-pbsv | NanoSV | 0.69 | 0.79 |
| pbsv | 0.71 | 0.78 |
| SVIM | 0.66 | 0.73 |
| NGMLR | NanoSV | 0.68 | 0.80 |
| Sniffles | 0.74 | 0.78 |
| pbsv | 0.69 | 0.79 |
| SVIM | 0.66 | 0.75 |

**Supplemental Table S7: F-measure of minimal support parameter testing**

| **Minimal support** | **F-measure** |
| --- | --- |
| 5 | 0.6733 |
| 10 | 0.7029 |
| 15 | 0.7127 |
| 20 | 0.7149 |
| 25 | 0.7066 |
| 30 | 0.6788 |
| 35 | 0.6166 |
| 40 | 0.5272 |
| 45 | 0.4511 |
| 50 | 0.4026 |
| 55 | 0.3711 |
| 60 | 0.3378 |
| 65 | 0.2915 |
| 70 | 0.2299 |

**Supplemental table S8: accession IDs**

|  | Library identifier | | | ENA accession fastq | | ENA accession fast5 | |
| --- | --- | --- | --- | --- | --- | --- | --- |
| **Read data** | P1-N | | | ERR3219853 | | ERR3046934 | |
| P2-S | | | ERR3219854 | | ERR3046935 | |
| P3-N | | | ERR3219855 | | ERR3046936 | |
| P4-N | | | ERR3219856 | | ERR3046937 | |
| P5-S | | | ERR3219857 | | ERR3046938 | |
|  | | Aligner | SV caller | | EVA accession | |
| **Variant data** | | minimap2 | Sniffles | | ERZ858036 | |
| NanoSV | | ERZ858031 | |
| SVIM | | ERZ858023 | |
| npInv | | ERZ858024 | |
| minimap2-pbsv | pbsv | | ERZ858025 | |
| SVIM | | ERZ858032 | |
| NanoSV | | ERZ858029 | |
| npInv | | ERZ858028 | |
| NGMLR | Sniffles | | ERZ858027 | |
| NanoSV | | ERZ858026 | |
| pbsv | | ERZ858030 | |
| SVIM | | ERZ858035 | |
| npInv | | ERZ858034 | |
| LAST | NanoSV | | ERZ858033 | |

## Supplemental Figures

| 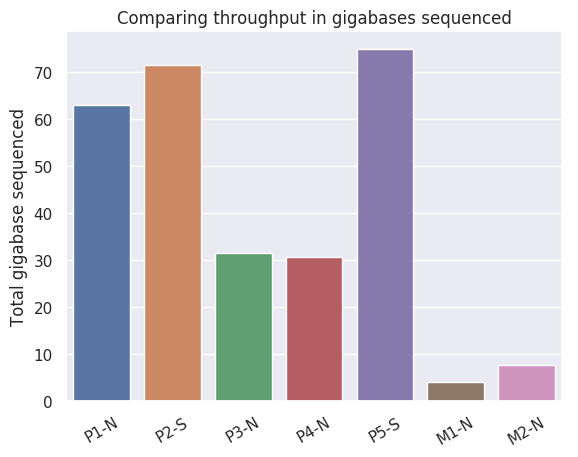 |
| --- |
| **Supplemental figure S1: throughput in gigabases per library** P: PromethION; M: MinION; N: non-sheared/native; S: sheared before library preparation |

#

| 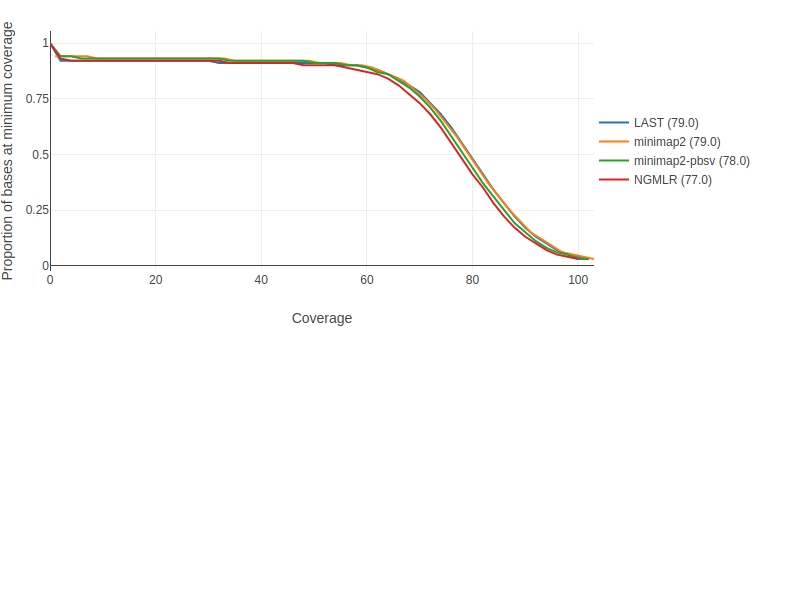 |
| --- |
| **Supplemental figure S2: Read depth distribution**  Read depth calculated using mosdepth for NA19240 PromethION datasets after alignment with LAST, mimimap2 with two parameter settings and NGMLR. Shows the proportion of the reference genome covered at least by a certain number of reads. |

| 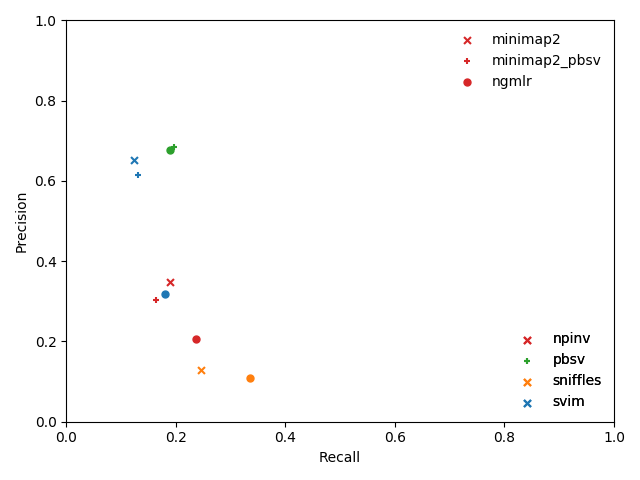 |
| --- |
| **Supplemental Figure S3: Precision recall evaluation of inversions**  Precision and recall for inversions separately were evaluated for all call sets. Symbols indicate aligners, colors indicate variant callers. |

| 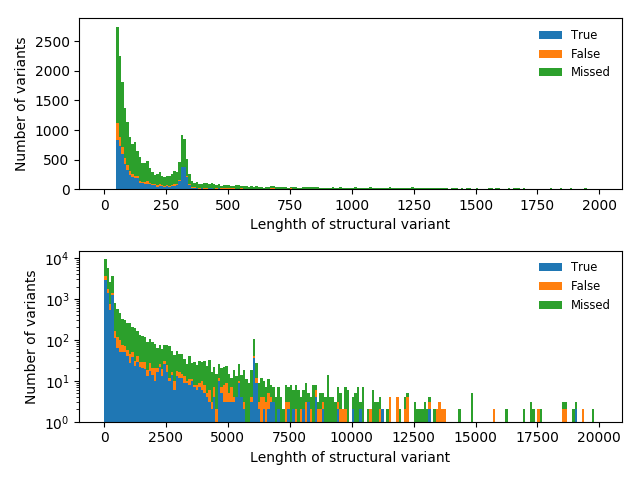 |
| --- |
| **Supplemental figure S4: length of identified SVs**  SVs identified using Manta after BWA-MEM alignment, compared to the truth set. The upper panel shows variants up to 2kb, the lower up to 20kb and uses a log transformation of the number of variants for visualization purposes. |

| 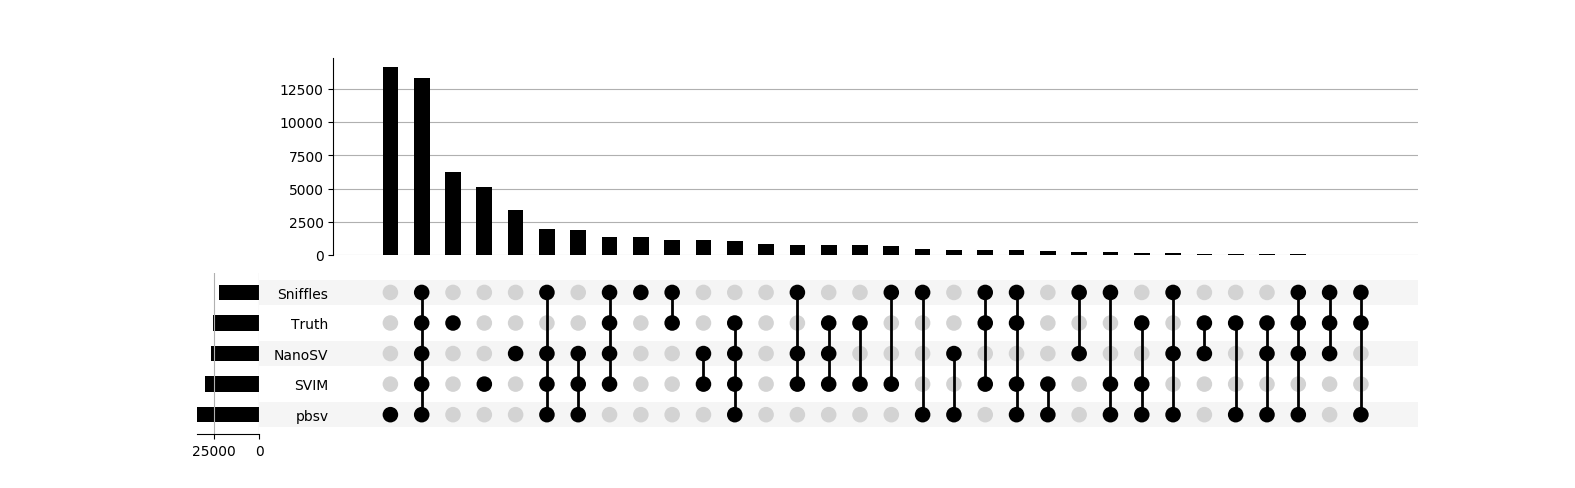 |
| --- |
| **Supplemental Figure S5: UpSet plot of SV calls after NGMLR alignment**  Showing the overlap between structural variants identified by the variant callers after NGMLR alignment and the truth set by Chaisson et al. 2018. A substantial proportion of variants shared by the variant callers is absent from the truth set. |

| 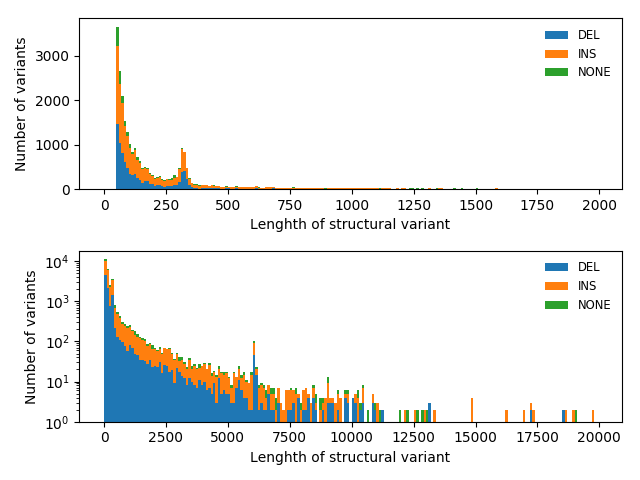 |
| --- |
| **Supplemental figure S6: length of identified SVs in the truth set** The upper panel shows variants up to 2kb, the lower up to 20kb and uses a log transformation of the number of variants for visualization purposes. |

| 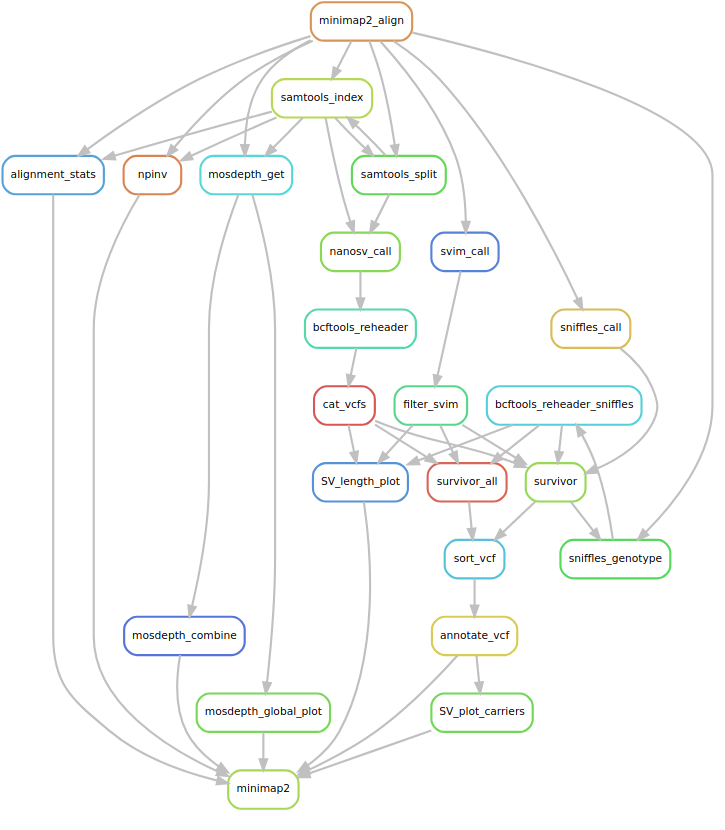 |
| --- |
| **Supplemental Figure S7: Graphical representation of a workflow**  Snakemake rule graph visualized using Graphviz, for minimap2 alignment. This graph shows the tools (rules) which are used sequentially to obtain the end result of annotated structural variants and visualizations. |

## Supplemental Code

All Python scripts for evaluation and plotting of our results are available on https://github.com/wdecoster/nano-snakemake/ and https://github.com/wdecoster/surpyvor and as Supplemental Code.
